# Supplementary material for: Integrated Process for Sequential Extraction of Bioactive Phenolic Compounds and Proteins from Mill and Field Olive Leaves and Effects on the Lignocellulosic Profile
Source: PubMed Central journal article supplement (PMC6915506; doi:10.3390/foods8110531), 2019-10-29
Supplement: foods-08-00531-s001.pdf [file foods-08-00531-s001.pdf]

Article

# Integrated process for sequential extraction of bioactive phenolic compounds and proteins from mill and field olive leaves and effects on the lignocellulosic profile

María del Mar Contreras <sup>1,\*</sup>, Antonio Lama-Muñoz <sup>1</sup>, José Manuel Gutiérrez-Pérez <sup>1,2</sup>, Francisco Espínola <sup>1,2</sup>, Manuel Moya <sup>1,2</sup>, Inmaculada Romero <sup>1,2</sup> and Eulogio Castro <sup>1,2</sup>

<sup>1</sup> Department of Chemical, Environmental and Materials Engineering, University of Jaén, Campus Las Lagunillas, 23071 Jaén, Spain; mcgamez@ujaen.es (M.d.M.C.); alama@ujaen.es (A.L.-M.); jmgp0014@red.ujaen.es (J.M.G.-P.); fespino@ujaen.es (F.E.); mmoya@ujaen.es (M.M.); iromero@ujaen.es (I.R.); ecastro@ujaen.es (E.C.)

<sup>2</sup> Center for Advanced Studies in Energy and Environment, University of Jaén, Campus Las Lagunillas, 23071 Jaén, Spain.

\* Correspondence: mcgamez@ujaen.es; mmcontreras@ugr.es; mar.contreras.gamez@gmail.com; Tel.: +34-953-21-27-99 (M.d.M.C.)

## Supplementary material

### Tables and figures

**Table S1.** Protein recovery from olive mill leaves subjected to different alkaline-thermal treatments (mild conditions).

| Assay n° | pH | NaOH concentration (M) | Time (min) | Temperature (°C) | Protein recovery (%) | Yield (solids) (%) |
|----------|----|------------------------|------------|------------------|----------------------|--------------------|
| 1        | 9  | 0.03                   | 125        | 60               | 12.3                 | 16.3               |
| 2        | 12 | 0.1                    | 240        | 40               | 11.4                 | 13.0               |
| 3        | 6  | 0.008                  | 240        | 80               | 10.8                 | 14.8               |
| 4        | 12 | 0.1                    | 240        | 80               | 21.7                 | 22.6               |
| 5        | 6  | 0.008                  | 10         | 80               | 10.3                 | 15.1               |
| 6        | 9  | 0.03                   | 125        | 60               | 14.8                 | 18.6               |
| 7        | 9  | 0.03                   | 125        | 60               | 15.9                 | 18.4               |
| 8        | 12 | 0.1                    | 10         | 40               | 17.8                 | 20.4               |
| 9        | 12 | 0.1                    | 125        | 60               | 20.4                 | 21.5               |
| 10       | 9  | 0.03                   | 10         | 60               | 12.7                 | 15.6               |
| 11       | 9  | 0.03                   | 240        | 60               | 14.1                 | 16.9               |
| 12       | 6  | 0.008                  | 125        | 60               | 10.0                 | 15.0               |
| 13       | 12 | 0.1                    | 10         | 80               | 20.8                 | 21.6               |
| 14       | 9  | 0.03                   | 125        | 60               | 13.4                 | 17.0               |
| 15       | 6  | 0.008                  | 10         | 40               | 9.8                  | 13.5               |
| 16       | 9  | 0.03                   | 125        | 80               | 16.0                 | 17.8               |
| 17       | 6  | 0.008                  | 240        | 40               | 10.3                 | 14.6               |
| 18       | 9  | 0.03                   | 125        | 40               | 13.6                 | 16.8               |

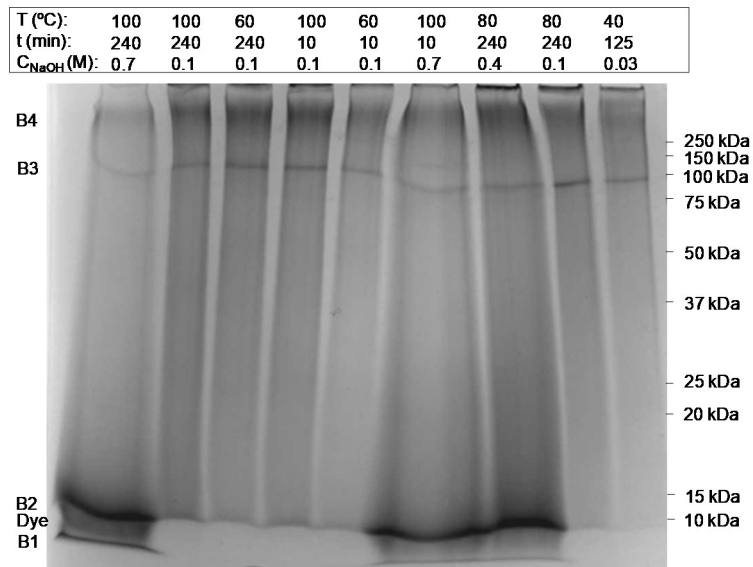

**Figure S1.** SDS-PAGE of protein extracts from olive mill leaves obtained at different extraction conditions.

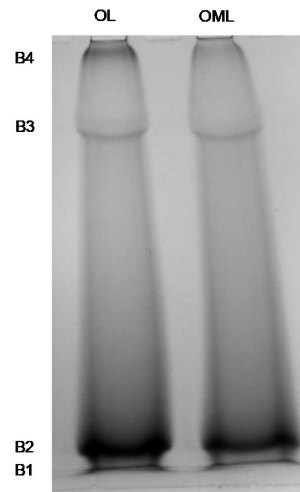

**Figure S2.** SDS-PAGE of protein extracts from olive mill leaves (OML) and olive leaves (OL) obtained using 0.7 M NaOH at 100 °C for 4 h.
